# Supplementary material
Source: PubMed Central journal article supplement (PMC1319347)
Supplement: cmaj_174_1_52__1.pdf [file cmaj_174_1_52__1.pdf]

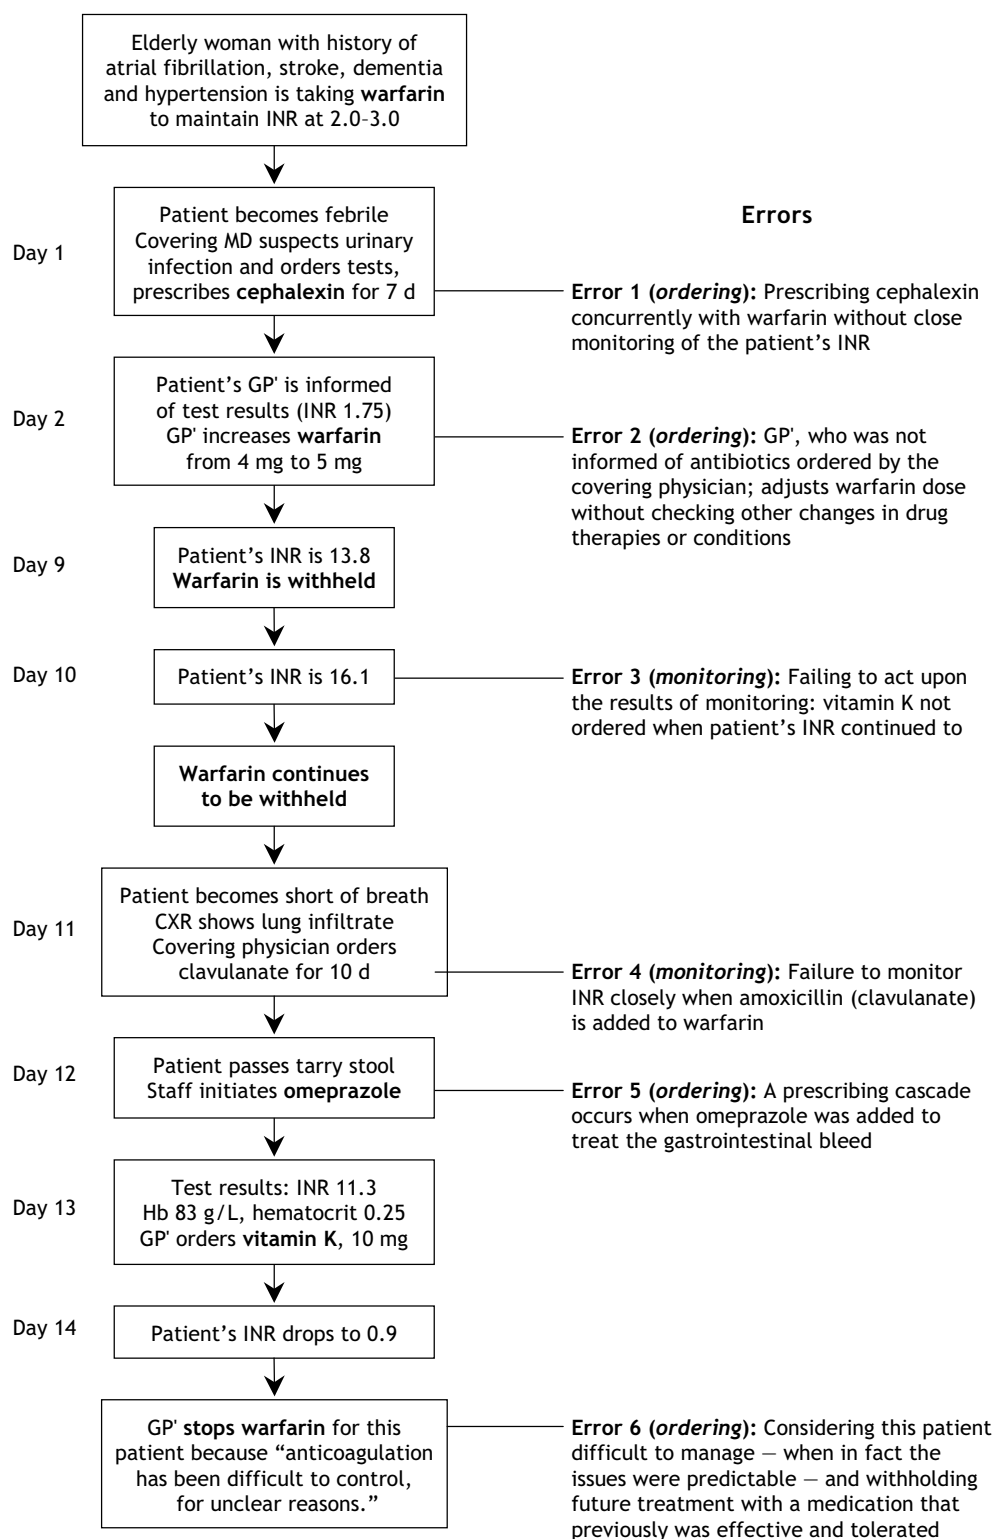

**Online figure:** Timeline for the case history, with descriptions of the errors made. MD = staff or covering physician, GP' = primary care physician, INR = international normalized ratio, CXR = chest radiography, Hb = hemoglobin.
